# Supplementary material for: Linking skeletal muscle aging with osteoporosis by lamin A/C deficiency
Source: PubMed Central journal article supplement (PMC7310860; doi:10.1371/journal.pbio.3000731), 2020-06-01

Fig 5A

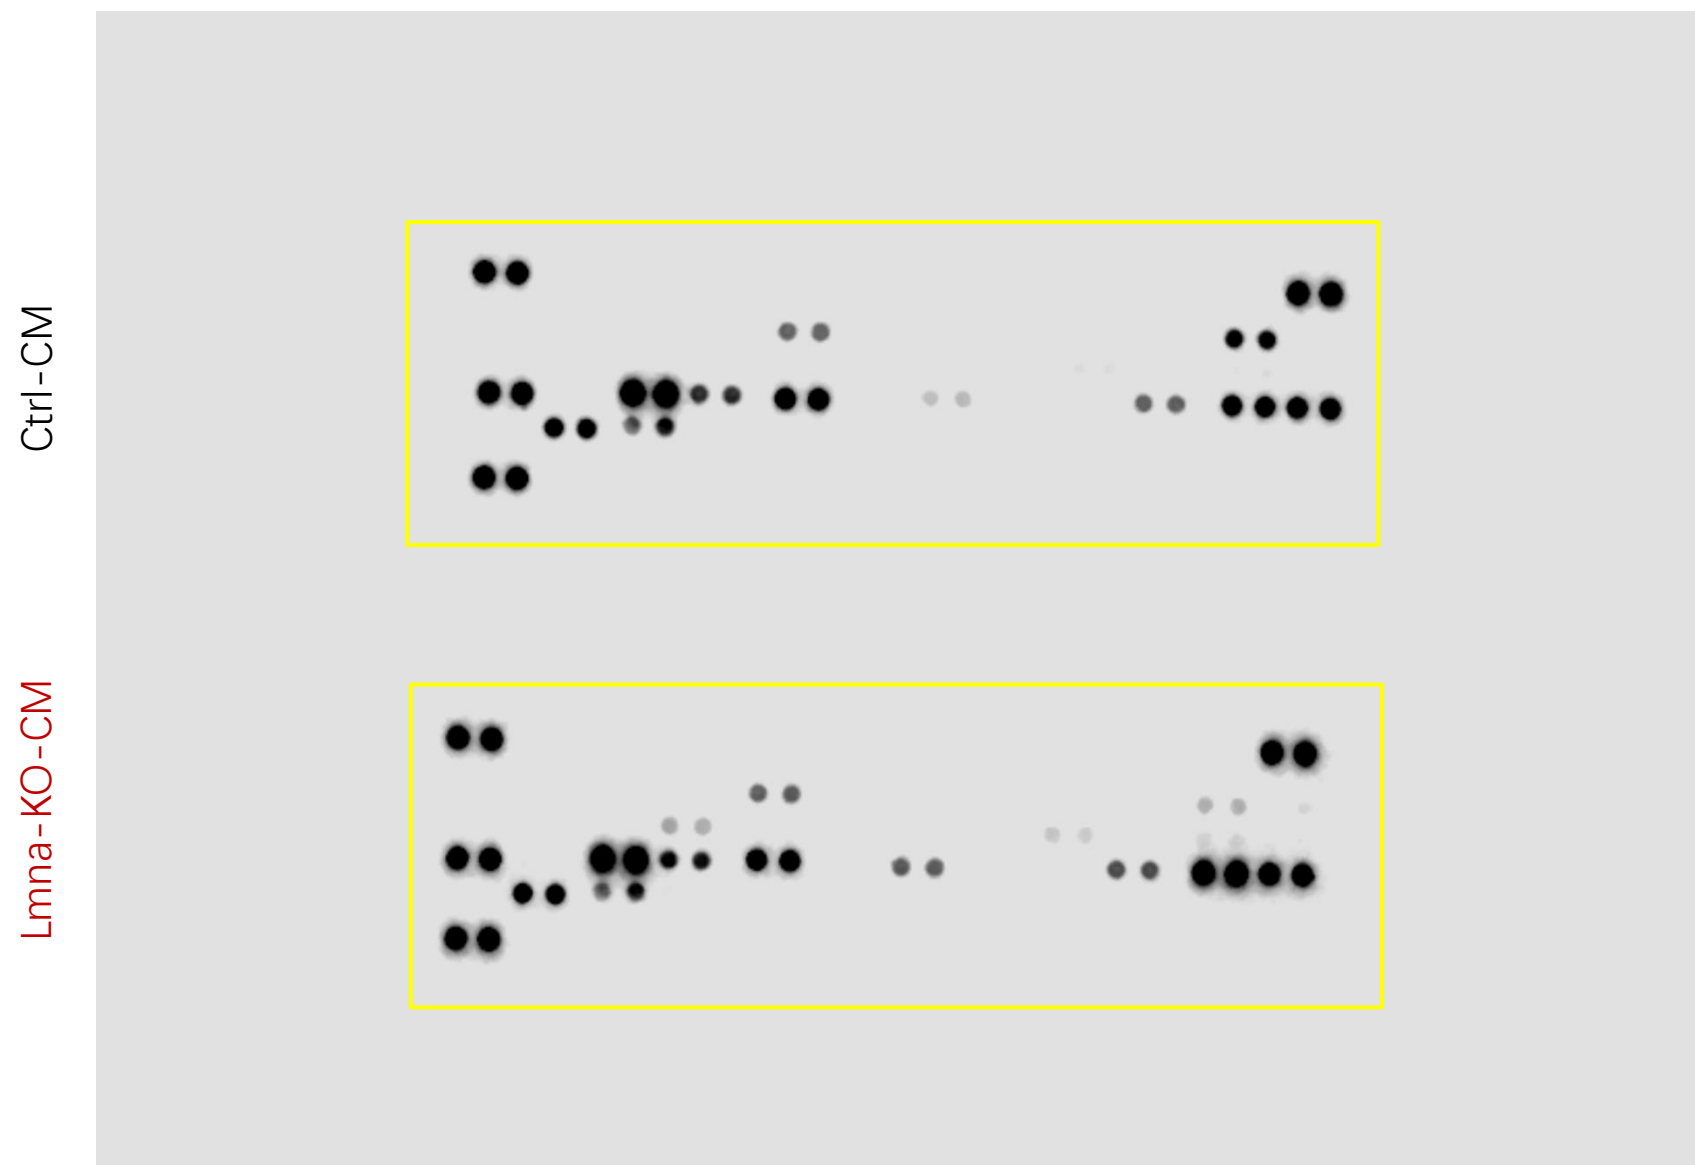

Fig 5D

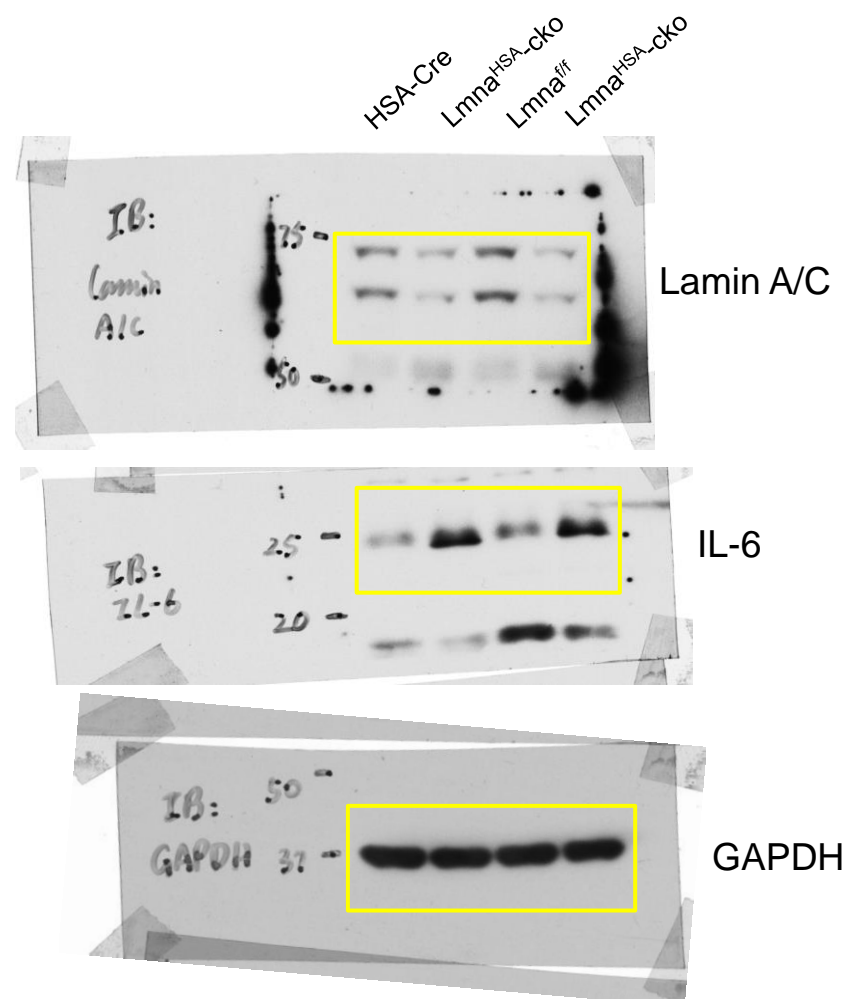

Fig 8C

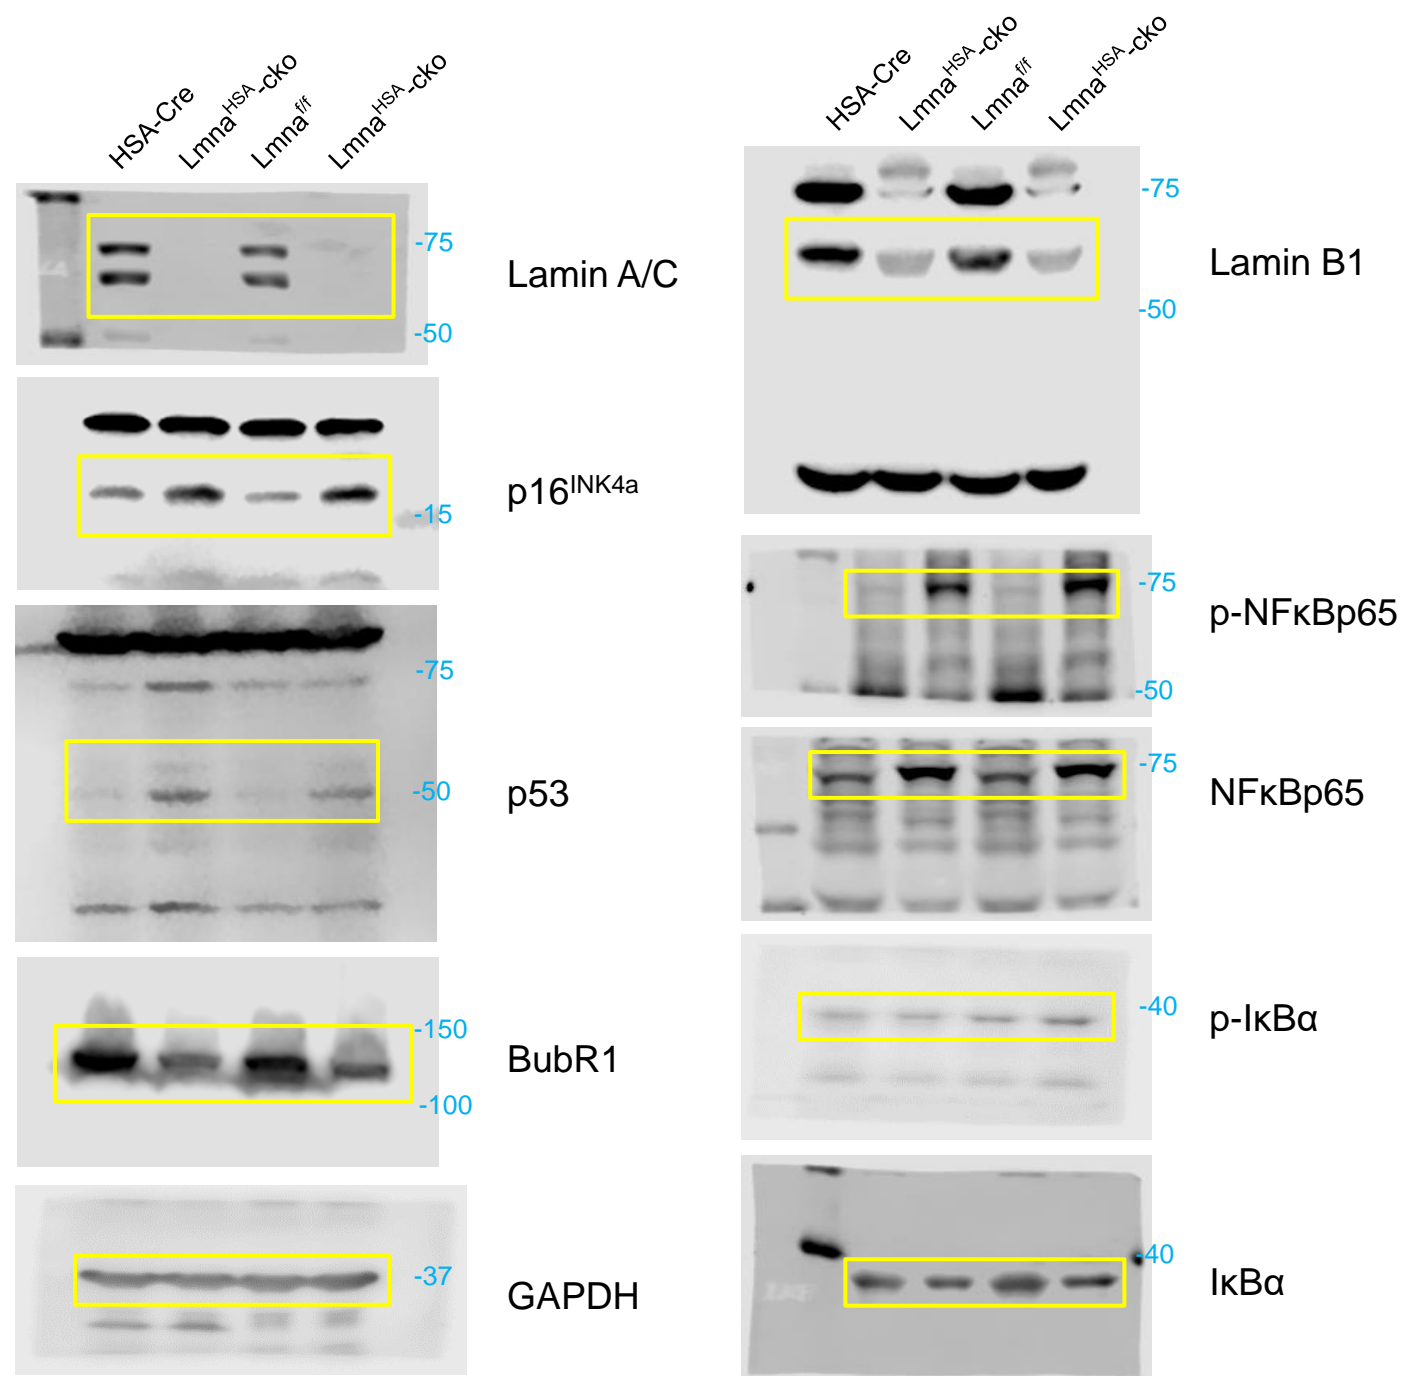

**Fig 8F**

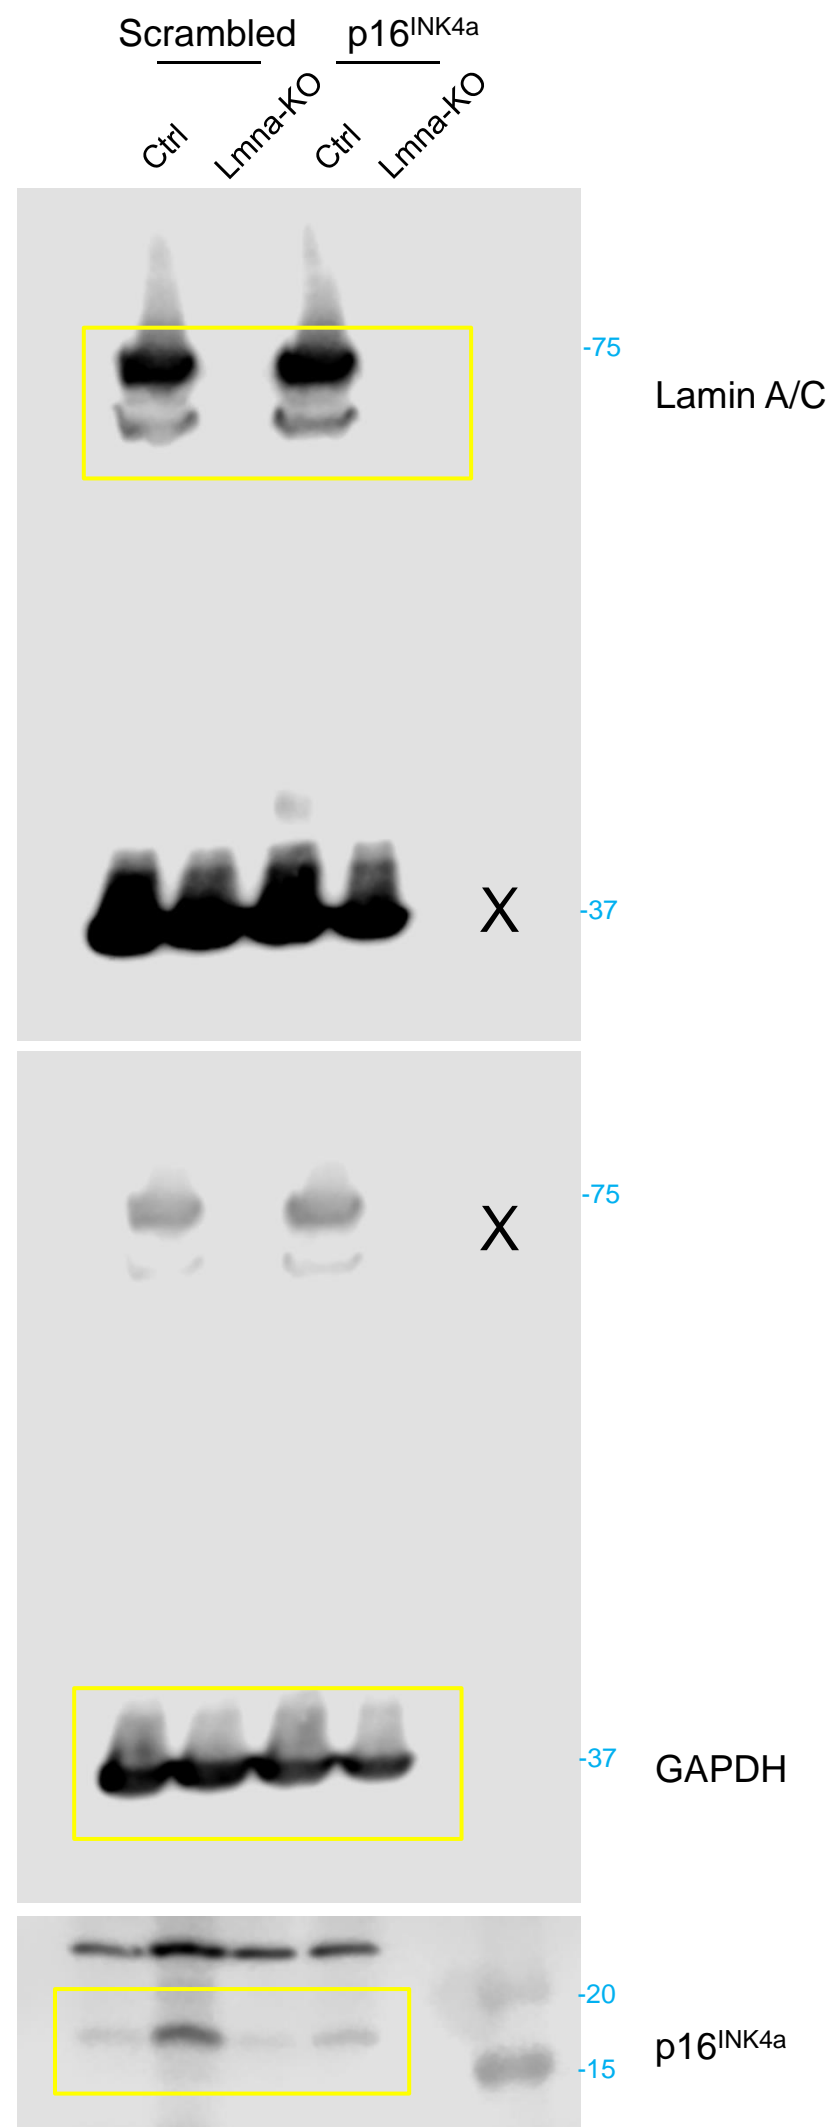

Fig S1B

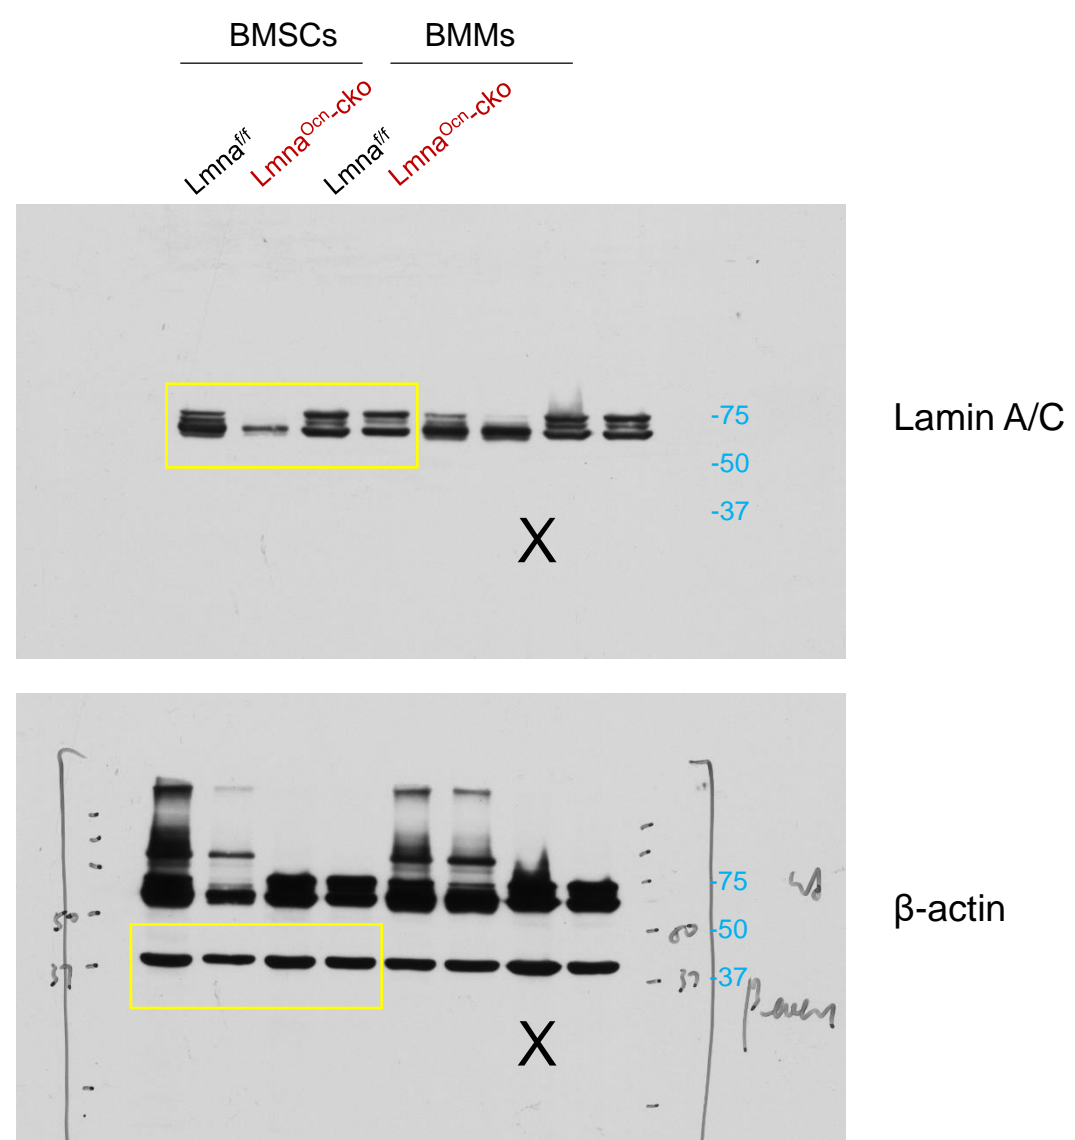

Fig S1C

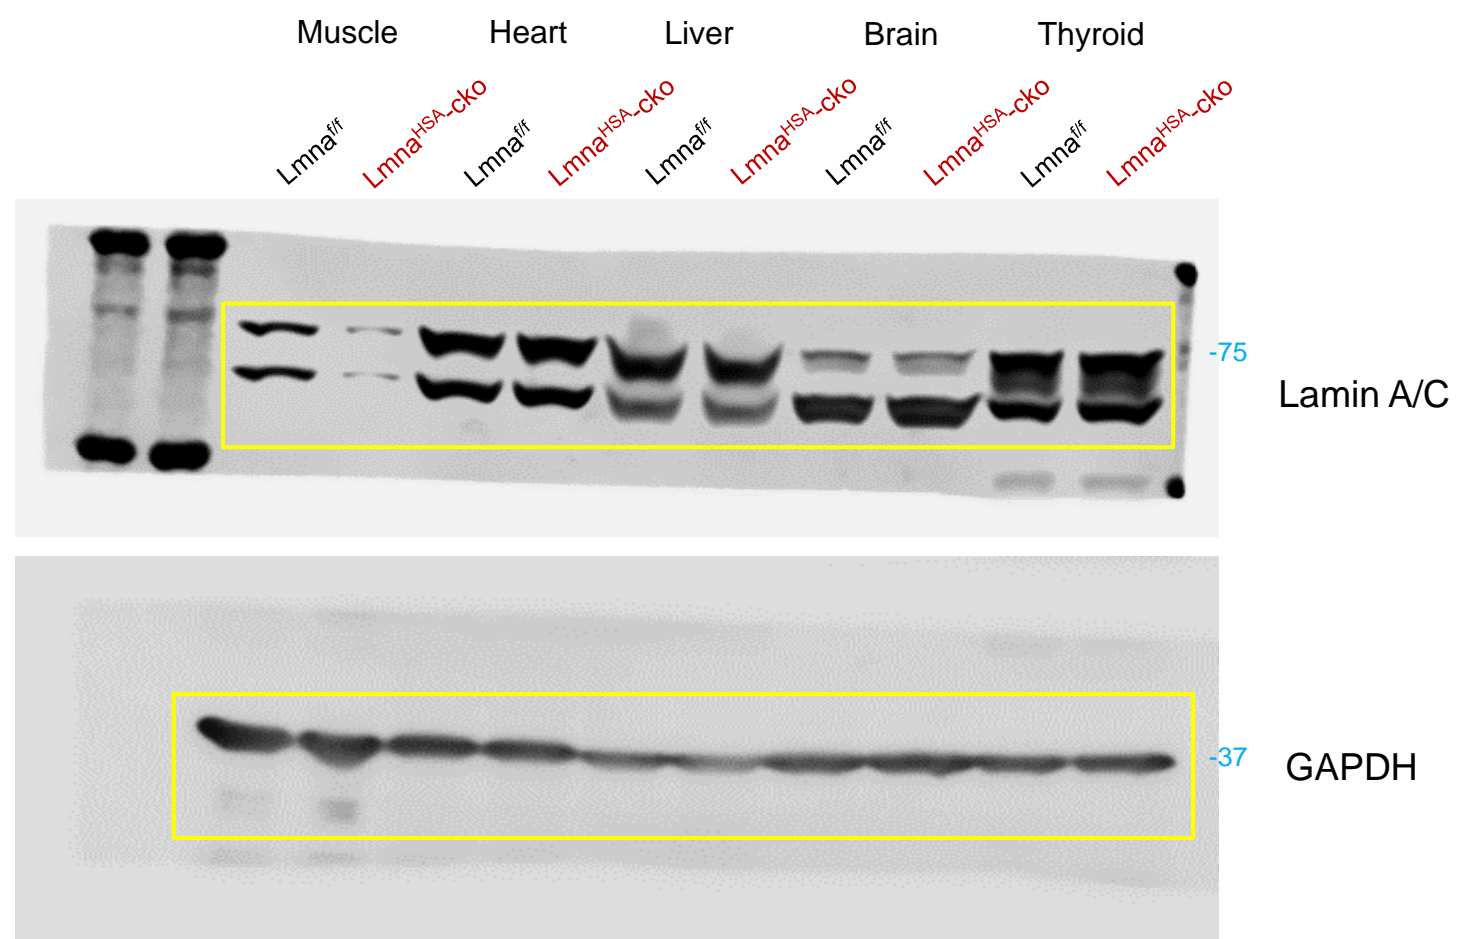

Fig S1D

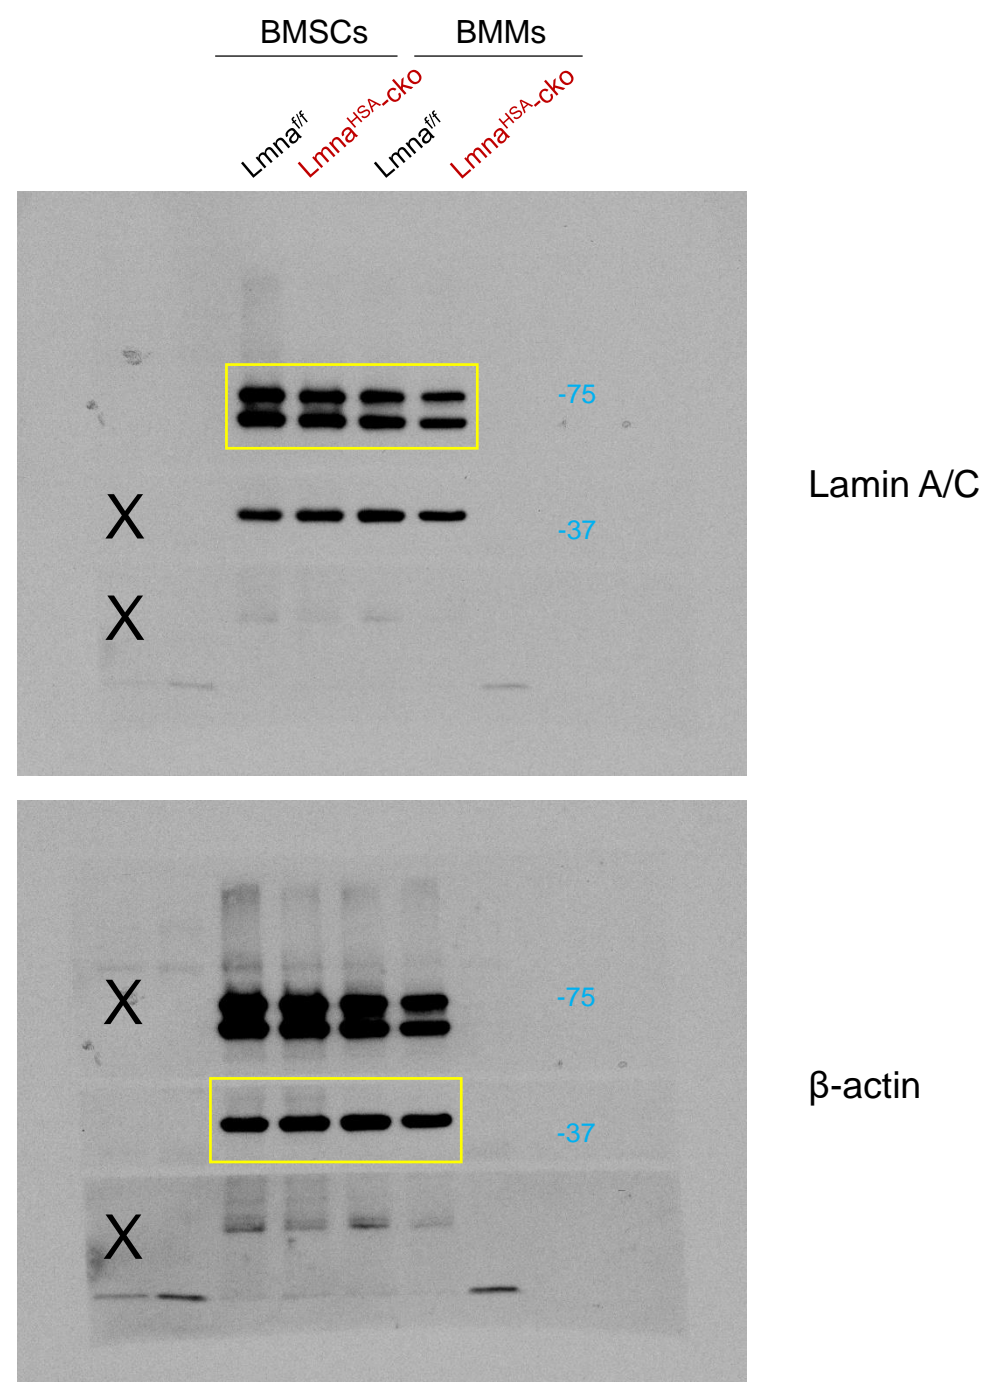

Fig S5B

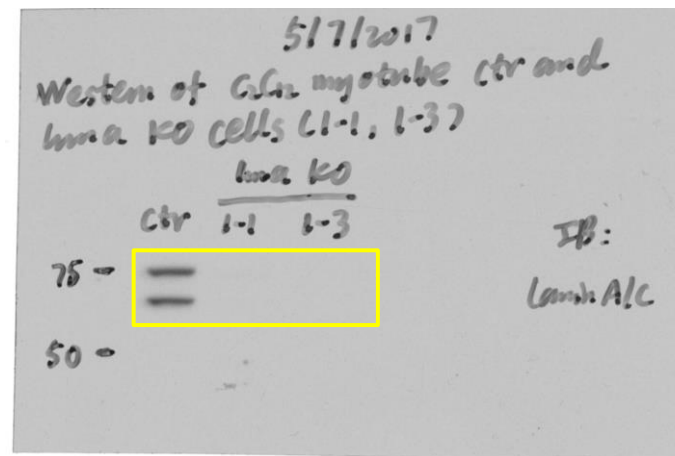

Lamin A/C

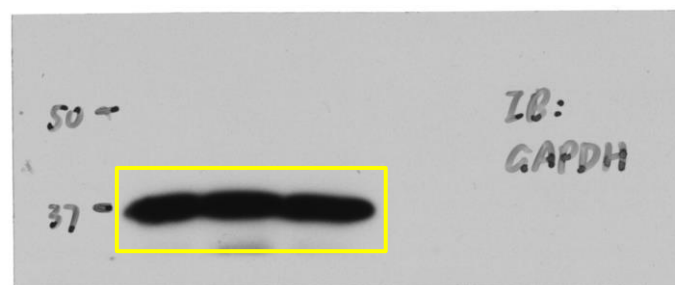

Gapdh



**Fig S10F**

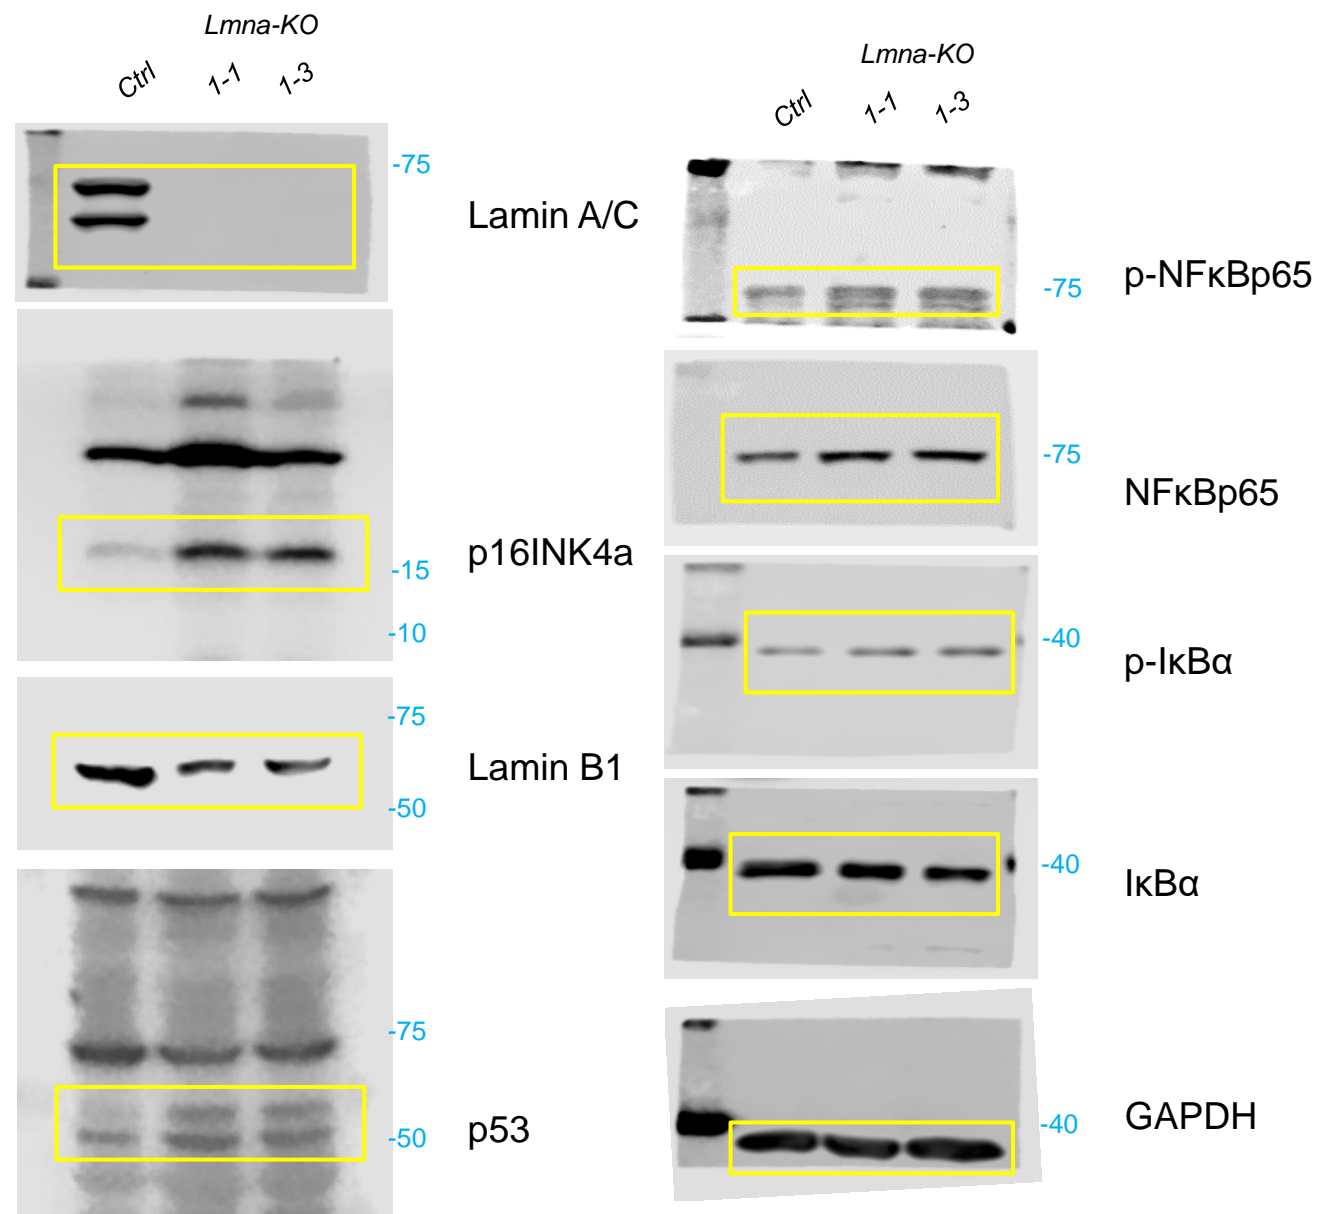

Supplement: pbio.3000731.s012.pdf [file pbio.3000731.s012.pdf]
